# Supplementary material for: Mismatch binding ligand upregulated back-splicing reaction producing circular RNA in a cellular model
Source: Royal Society of Chemistry journal article supplement (doi:10.1039/d1cc06936e), 2022-01-01
Supplement: d1cc06936e1.xlsx [file d1cc06936e1.xlsx]

## Sheet: Fig 3
pre-mGGA transfected cell (batch 1)				HeLa only
Beta actin				Beta actin
	Ct				Ct
pre-mGGA 0uM NCD	19.5484			HeLa only	19.8933
	19.6481				19.9454
	19.5081				20.2043
pre-mGGA 5uM NCD	19.4555			CircRNA
	19.1899				Ct
	19.6635			HeLa only	33.3999
CircRNA					33.9887
	Ct				35.9432
pre-mGGA 0uM	27.5233
	27.1621
	26.7867
pre-mGGA 5uM	24.225
	24.5014
	25.1424
Beta actin Average	19.5022			Beta actin Average	20.0144
Standard Deviation	0.157666			Standard Deviation	0.135999
circRNA Average				circRNA Average
0 uM NCD	27.1574			HeLa only	34.4439
Standard Deviation	0.30077			Standard Deviation	1.08704
5 uM NCD	24.6229
Standard Deviation	0.38427

## Sheet: Fig 4A GGA
pre-mGGA
Batch 1							Batch 1						Batch 2						Batch 3
beta actin	Ct						beta actin Ct	circZKSCAN1 Ct	delta Ct	delta delta Ct	Relative RQ		beta actin Ct	circZKSCAN1 Ct	delta Ct	delta delta Ct	Relative RQ		beta actin Ct	circZKSCAN1 Ct	delta Ct	delta delta Ct	Relative RQ
GGA 0uM	19.5484					GGA 0uM	19.5484	27.5233	7.97494	0.387615	0.764392		18.9216	27.7621	8.8405	0.187368	0.878206		18.8047	28.98	10.1753	1.00749	0.49741
GGA 0.5uM	19.5103						19.6481	27.1621	7.514	-0.0733234	1.05214		19.0508	26.7646	7.71379	-0.939339	1.91765		18.9064	27.7986	8.8922	-0.275594	1.21049
GGA 1uM	19.5096						19.5081	26.7867	7.2786	-0.308732	1.23862		19.047	28.7514	9.70446	1.05133	0.482524		18.903	27.8963	8.99333	-0.174463	1.12854
GGA 3uM	19.7485					GGA 0.5uM	19.5103	27.7351	8.22475	0.637425	0.64286		18.9616	27.8701	8.90851	0.255385	0.837764		18.6911	28.9014	10.2103	1.04247	0.485495
GGA 5uM	19.4555						19.3621	27.5754	8.21336	0.626035	0.647955		19.0181	28.2764	9.25837	0.605242	0.657361		19.0113	27.9697	8.95837	-0.209427	1.15623
GGA 5uM QCD	19.9083						19.4819	27.052	7.5701	-0.017228	1.01201		19.062	28.6438	9.58172	0.928593	0.525371		18.9402	27.3313	8.39116	-0.77663	1.71312
						GGA 1uM	19.5096	26.9081	7.39848	-0.188851	1.13986		18.9698	27.7253	8.75548	0.102352	0.931513		18.8219	26.6875	7.86558	-1.30222	2.46608
GGA 0uM	19.6481						19.4375	26.7308	7.29332	-0.294007	1.22604		19.021	27.4334	8.41239	-0.240742	1.1816		18.9042	27.3458	8.44151	-0.726288	1.65438
GGA 0.5uM	19.3621						19.4729	26.7481	7.27529	-0.312039	1.24146		18.9621	27.2676	8.30546	-0.347671	1.27251		18.8835	26.644	7.76048	-1.40731	2.65243
GGA 1uM	19.4375					GGA 3uM	19.7485	25.2212	5.4727	-2.11463	4.33079		18.9501	25.8712	6.92113	-1.732	3.32189		18.9833	26.7382	7.75489	-1.41291	2.66273
GGA 3uM	19.4299						19.4299	25.3889	5.95904	-1.62829	3.09146		19.0976	26.3798	7.2822	-1.37093	2.58636		19.002	26.6263	7.62437	-1.54342	2.91486
GGA 5uM	19.1899						19.5505	25.407	5.85647	-1.73086	3.31925		19.0288	25.9065	6.87774	-1.77539	3.42331		19.029	26.5588	7.52975	-1.63804	3.11243
GGA 5uM QCD	19.8553					GGA 5uM	19.4555	24.225	4.76953	-2.8178	7.05087		18.9756	25.2534	6.27785	-2.37528	5.18837		19.344	26.0448	6.7008	-2.467	5.52892
							19.1899	24.5014	5.31143	-2.2759	4.84299		19.0125	24.7232	5.71072	-2.94241	7.68694		19.381	25.4936	6.11264	-3.05515	8.31174
GGA 0uM	19.5081						19.6635	25.1424	5.47898	-2.10835	4.31197		19.07	25.5589	6.48884	-2.16429	4.48245		19.3273	26.8666	7.53933	-1.62847	3.09184
GGA 0.5uM	19.4819					GGA 5uM QCD	19.9083	27.4221	7.51381	-0.073517	1.05228		19.6259	29.508	9.88213	1.229	0.426612		19.4335	25.8082	6.37475	-2.79304	6.93091
GGA 1uM	19.4729						19.8553	28.9653	9.10994	1.52262	0.348054		19.5086	29.9108	10.4022	1.7491	0.297487		19.191	30.5096	11.3186	2.15079	0.225189
GGA 3uM	19.5505						19.9806	27.4802	7.49961	-0.0877182	1.06269		19.6294	30.0858	10.4564	1.80329	0.28652		19.4722	28.9711	9.49895	0.331152	0.794901
GGA 5uM	19.6635
GGA 5uM QCD	19.9806
circRNA		delta Ct							delta Ct	delta delta Ct	RQ	Average	Stdev	p value		Batch 1	0uM ct avg
GGA 0uM	27.5233	7.97494					GGA 0uM	Batch 1	7.97494	0.387615	0.764392						27.1574
GGA 0.5uM	27.7351	8.22475							7.514	-0.0733234	1.05214						beta act average
GGA 1uM	26.9081	7.39848							7.2786	-0.308732	1.23862						19.5701
GGA 3uM	25.2212	5.4727						Batch 2	8.8405	0.187368	0.878206	0.967114	0.249531			Batch 2	0uM ct avg
GGA 5uM	24.225	4.76953							7.71379	-0.939339							27.7594
GGA 5uM QCD	27.4221	7.51381							9.70446	1.05133							beta act average
								Batch 3	10.1753	1.00749	0.49741						19.1063
GGA 0uM	27.1621	7.514							8.8922	-0.275594	1.21049					Batch 3	0uM ct avg
GGA 0.5uM	27.5754	8.21336							8.99333	-0.174463	1.12854						28.225
GGA 1uM	26.7308	7.29332															beta act average
GGA 3uM	25.3889	5.95904					GGA 0.5 uM	Batch 1	8.22475	0.637425	0.64286						19.0572
GGA 5uM	24.5014	5.31143							8.21336	0.626035	0.647955
GGA 5uM QCD	28.9653	9.10994							7.5701	-0.017228	1.01201
								Batch 2	8.90851	0.255385	0.837764	0.782793	0.212058	0.193132
GGA 0uM	26.7867	7.2786							9.25837	0.605242	0.657361
GGA 0.5uM	27.052	7.5701							9.58172	0.928593	0.525371
GGA 1uM	26.7481	7.27529						Batch 3	10.2103	1.04247
GGA 3uM	25.407	5.85647							8.95837	-0.209427	1.15623
GGA 5uM	25.1424	5.47898							8.39116	-0.77663
GGA 5uM QCD	27.4802	7.49961
							GGA 1 uM	Batch 1	7.39848	-0.188851	1.13986
Batch 2									7.29332	-0.294007	1.22604
beta actin									7.27529	-0.312039	1.24146	1.45456	0.441978	0.0365499
GGA 0uM	18.9216							Batch 2	8.75548	0.102352
GGA 0.5uM	18.9616								8.41239	-0.240742	1.1816
GGA 1uM	18.9698								8.30546	-0.347671	1.27251
GGA 3uM	18.9501							Batch 3	7.86558	-1.30222	2.46608
GGA 5uM	18.9756								8.44151	-0.726288	1.65438
GGA 5uM QCD	19.6259								7.76048	-1.40731
GGA 0uM	19.0508						GGA 3 uM	Batch 1	5.4727	-2.11463
GGA 0.5uM	19.0181								5.95904	-1.62829	3.09146
GGA 1uM	19.021								5.85647	-1.73086	3.31925	3.12085	0.246257	3.74714e-09
GGA 3uM	19.0976							Batch 2	6.92113	-1.732	3.32189
GGA 5uM	19.0125								7.2822	-1.37093
GGA 5uM QCD	19.5086								6.87774	-1.77539	3.42331
								Batch 3	7.75489	-1.41291	2.66273
GGA 0uM	19.047								7.62437	-1.54342	2.91486
GGA 0.5uM	19.062								7.52975	-1.63804	3.11243
GGA 1uM	18.9621
GGA 3uM	19.0288						GGA 5 uM	Batch 1	4.76953	-2.8178	7.05087
GGA 5uM	19.07								5.31143	-2.2759	4.84299
GGA 5uM QCD	19.6294								5.47898	-2.10835	4.31197	5.58464	1.20203	8.6172e-07
								Batch 2	6.27785	-2.37528	5.18837
circRNA		delta Ct							5.71072	-2.94241	7.68694
GGA 0uM	27.7621	8.8405							6.48884	-2.16429	4.48245
GGA 0.5uM	27.8701	8.90851						Batch 3	6.7008	-2.467	5.52892
GGA 1uM	27.7253	8.75548							6.11264	-3.05515
GGA 3uM	25.8712	6.92113							7.53933	-1.62847
GGA 5uM	25.2534	6.27785
GGA 5uM QCD	29.508	9.88213					GGA 5 uM Q	Batch 1	7.51381	-0.073517	1.05228
									9.10994	1.52262	0.348054
GGA 0uM	26.7646	7.71379							7.49961	-0.0877182	1.06269	0.609792	0.324978	0.0539556
GGA 0.5uM	28.2764	9.25837						Batch 2	9.88213	1.229	0.426612
GGA 1uM	27.4334	8.41239							10.4022	1.7491	0.297487
GGA 3uM	26.3798	7.2822							10.4564	1.80329	0.28652
GGA 5uM	24.7232	5.71072						Batch 3	6.37475	-2.79304
GGA 5uM QCD	29.9108	10.4022							11.3186	2.15079
									9.49895	0.331152	0.794901
GGA 0uM	28.7514	9.70446
GGA 0.5uM	28.6438	9.58172
GGA 1uM	27.2676	8.30546
GGA 3uM	25.9065	6.87774
GGA 5uM	25.5589	6.48884
GGA 5uM QCD	30.0858	10.4564
Batch 3
beta actin
GGA 0uM	18.8047
GGA 0.5uM	18.6911
GGA 1uM	18.8219
GGA 3uM	18.9833
GGA 5uM	19.344
GGA 5uM QCD	19.4335
GGA 0uM	18.9064
GGA 0.5uM	19.0113
GGA 1uM	18.9042
GGA 3uM	19.002
GGA 5uM	19.381
GGA 5uM QCD	19.191
GGA 0uM	18.903
GGA 0.5uM	18.9402
GGA 1uM	18.8835
GGA 3uM	19.029
GGA 5uM	19.3273
GGA 5uM QCD	19.4722
circRNA		delta Ct
GGA 0uM	28.98	10.1753
GGA 0.5uM	28.9014	10.2103
GGA 1uM	26.6875	7.86558
GGA 3uM	26.7382	7.75489
GGA 5uM	26.0448	6.7008
GGA 5uM QCD	25.8082	6.37475
GGA 0uM	27.7986	8.8922
GGA 0.5uM	27.9697	8.95837
GGA 1uM	27.3458	8.44151
GGA 3uM	26.6263	7.62437
GGA 5uM	25.4936	6.11264
GGA 5uM QCD	30.5096	11.3186
GGA 0uM	27.8963	8.99333
GGA 0.5uM	27.3313	8.39116
GGA 1uM	26.644	7.76048
GGA 3uM	26.5588	7.52975
GGA 5uM	26.8666	7.53933
GGA 5uM QCD	28.9711	9.49895

## Sheet: Fig 4B UCC
pre-mUCC
Batch 1							Batch 1						Batch 2						Batch 3
beta actin	Ct						beta actin Ct	circZKSCAN1 Ct	delta Ct	delta delta Ct	Relative RQ		beta actin Ct	circZKSCAN1 Ct	delta Ct	delta delta Ct	Relative RQ		beta actin Ct	circZKSCAN1 Ct	delta Ct	delta delta Ct	Relative RQ
UCC 0uM	18.9076					GGA 0uM	18.9076	23.2432	4.33556	-0.178585	1.13177		18.8212	21.4485	2.62732	0.451526	0.731269					-5.79566	55.5477
UCC 0.5uM	19.1033						19.2334	24.7455	5.51215	0.998009	0.500691		18.8984	21.2031	2.30479	0.128996	0.914468					-5.79566	55.5477
UCC 1uM	19.2217						19.2656	23.435	4.16938	-0.344757	1.26994		18.9089	20.9086	1.9997	-0.176097	1.12982					-5.79566	55.5477
UCC 3uM	19.0417					GGA 0.5uM	19.1033	23.0988	3.9955	-0.518636	1.4326		18.9155	21.9509	3.03536	0.859567	0.551118					-5.79566	55.5477
UCC 5uM	19.1376						19.4068	23.472	4.06519	-0.448948	1.36504		18.9245	21.3062	2.3817	0.205905	0.866995					-5.79566	55.5477
UCC 5uM QCD	19.6338						19.3976	22.5937	3.19604	-1.3181	2.49338		18.8854	20.8984	2.01301	-0.162786	1.11945					-5.79566	55.5477
						GGA 1uM	19.2217	23.9063	4.68467	0.170529	0.888517		18.9621	21.8594	2.89732	0.721519	0.606459					-5.79566	55.5477
UCC 0uM	19.2334						19.398	24.0165	4.61854	0.104397	0.930194		18.9354	21.4395	2.50404	0.328245	0.796505					-5.79566	55.5477
UCC 0.5uM	19.4068						19.3963	23.2724	3.87612	-0.638025	1.5562		18.9326	21.1496	2.217	0.0412012	0.971845					-5.79566	55.5477
UCC 1uM	19.398					GGA 3uM	19.0417	24.0027	4.96102	0.446877	0.733629		18.8896	21.0782	2.18863	0.0128334	0.991144					-5.79566	55.5477
UCC 3uM	19.31						19.31	23.5071	4.19707	-0.317068	1.2458		18.9685	21.1262	2.15769	-0.0181025	1.01263					-5.79566	55.5477
UCC 5uM	18.6277						19.4161	24.5454	5.12934	0.615202	0.652838		18.9669	21.5429	2.57594	0.40014	0.757785					-5.79566	55.5477
UCC 5uM QCD	19.6719					GGA 5uM	19.1376	23.4904	4.35287	-0.16127	1.11827		18.9504	21.9069	2.95648	0.780684	0.582091					-5.79566	55.5477
							18.6277	23.6957	5.06796	0.553818	0.681215		18.9201	20.9699	2.04976	-0.126032	1.09129					-5.79566	55.5477
UCC 0uM	19.2656						19.3217	24.721	5.39929	0.885151	0.541431		19.3089	21.3216	2.01272	-0.163072	1.11967					-5.79566	55.5477
UCC 0.5uM	19.3976					GGA 5uM QCD	19.6338	24.6503	5.01643	0.502287	0.705987		19.4864	22.7509	3.26452	1.08872	0.470179					-5.79566	55.5477
UCC 1uM	19.3963						19.6719	24.8557	5.1838	0.669657	0.628656		19.4657	22.1051	2.63942	0.463627	0.725161					-5.79566	55.5477
UCC 3uM	19.4161						19.7968	24.7065	4.90974	0.395598	0.760174		19.0567	22.1869	3.13021	0.95441	0.516053					-5.79566	55.5477
UCC 5uM	19.3217
UCC 5uM QCD	19.7968
circRNA		delta Ct							delta Ct	delta delta Ct	RQ	Average	Stdev	p value		Batch 1	0uM ct avg
UCC 0uM	23.2432	4.33556						Batch 1	4.33556	-0.178585	1.13177						23.8079
UCC 0.5uM	23.0988	3.9955					UCC 0uM		5.51215	0.998009	0.500691						beta act average
UCC 1uM	23.9063	4.68467							4.16938	-0.344757	1.26994						19.2938
UCC 3uM	24.0027	4.96102						Batch 2	2.62732	0.451526	0.731269	0.986312	0.263437			Batch 2	0uM ct avg
UCC 5uM	23.4904	4.35287							2.30479	0.128996	0.914468						21.1868
UCC 5uM QCD	24.6503	5.01643							1.9997	-0.176097	1.12982						beta act average
								Batch 3	5.50143	-0.294223	1.22622						19.011
UCC 0uM	24.7455	5.51215							7.24689	1.45123						Batch 3	0uM ct avg
UCC 0.5uM	23.472	4.06519							5.26886	-0.5268							24.7672
UCC 1uM	24.0165	4.61854															beta act average
UCC 3uM	23.5071	4.19707						Batch 1	3.9955	-0.518636	1.4326						18.9715
UCC 5uM	23.6957	5.06796					UCC 0.5 uM		4.06519	-0.448948	1.36504
UCC 5uM QCD	24.8557	5.1838							3.19604	-1.3181
								Batch 2	3.03536	0.859567		1.28106	0.3811	0.145111
UCC 0uM	23.435	4.16938							2.3817	0.205905	0.866995
UCC 0.5uM	22.5937	3.19604							2.01301	-0.162786	1.11945
UCC 1uM	23.2724	3.87612						Batch 3	5.22463	-0.571025	1.48558
UCC 3uM	24.5454	5.12934							6.22732	0.43166	0.741408
UCC 5uM	24.721	5.39929							4.82749	-0.968166	1.95635
UCC 5uM QCD	24.7065	4.90974
								Batch 1	4.68467	0.170529	0.888517
							UCC 1 uM		4.61854	0.104397	0.930194
Batch 2									3.87612	-0.638025	1.5562	1.15231	0.327076	0.352064
UCC 0uM	18.8212							Batch 2	2.89732	0.721519
UCC 0.5uM	18.9155								2.50404	0.328245	0.796505
UCC 1uM	18.9621								2.217	0.0412012	0.971845
UCC 3uM	18.8896							Batch 3	4.96315	-0.832504
UCC 5uM	18.9504								5.50865	-0.287008	1.22011
UCC 5uM QCD	19.4864								5.02774	-0.767911	1.7028
UCC 0uM	18.8984							Batch 1	4.96102	0.446877
UCC 0.5uM	18.9245						UCC 3 uM		4.19707	-0.317068	1.2458
UCC 1uM	18.9354								5.12934	0.615202	0.652838	0.967455	0.187916	0.888862
UCC 3uM	18.9685							Batch 2	2.18863	0.0128334	0.991144
UCC 5uM	18.9201								2.15769	-0.0181025	1.01263
UCC 5uM QCD	19.4657								2.57594	0.40014	0.757785
								Batch 3	5.63069	-0.16497	1.12114
UCC 0uM	18.9089								5.05867	-0.736989
UCC 0.5uM	18.8854								5.80891	0.0132585	0.990852
UCC 1uM	18.9326
UCC 3uM	18.9669							Batch 1	4.35287	-0.16127	1.11827
UCC 5uM	19.3089						UCC 5 uM		5.06796	0.553818	0.681215
UCC 5uM QCD	19.0567								5.39929	0.885151	0.541431	0.805277	0.267293	0.260255
								Batch 2	2.95648	0.780684	0.582091
		delta Ct							2.04976	-0.126032	1.09129
UCC 0uM	21.4485	2.62732							2.01272	-0.163072
UCC 0.5uM	21.9509	3.03536						Batch 3	8.02102	2.22537
UCC 1uM	21.8594	2.89732							6.77615	0.980492	0.506807
UCC 3uM	21.0782	2.18863							5.63753	-0.158128	1.11584
UCC 5uM	21.9069	2.95648
UCC 5uM QCD	22.7509	3.26452						Batch 1	5.01643	0.502287	0.705987
							UCC 5 uM Q		5.1838	0.669657	0.628656
UCC 0uM	21.2031	2.30479							4.90974	0.395598	0.760174	0.750654	0.182463	0.0968156
UCC 0.5uM	21.3062	2.3817						Batch 2	3.26452	1.08872
UCC 1uM	21.4395	2.50404							2.63942	0.463627	0.725161
UCC 3uM	21.1262	2.15769							3.13021	0.95441	0.516053
UCC 5uM	20.9699	2.04976						Batch 3	6.1769	0.381249	0.767773
UCC 5uM QCD	22.1051	2.63942							5.59305	-0.202609	1.15078
									5.30472	-0.490938
UCC 0uM	20.9086	1.9997
UCC 0.5uM	20.8984	2.01301
UCC 1uM	21.1496	2.217
UCC 3uM	21.5429	2.57594
UCC 5uM	21.3216	2.01272
UCC 5uM QCD	22.1869	3.13021
Batch 3
beta actin
UCC 0uM	18.8389
UCC 0.5uM	18.8031
UCC 1uM	18.7832
UCC 3uM	18.9462
UCC 5uM	18.9957
UCC 5uM QCD	19.2204
UCC 0uM	18.6499
UCC 0.5uM	18.7151
UCC 1uM	18.8259
UCC 3uM	18.9289
UCC 5uM	19.2192
UCC 5uM QCD	19.2084
UCC 0uM	18.7955
UCC 0.5uM	18.8069
UCC 1uM	18.9672
UCC 3uM	18.9017
UCC 5uM	19.4224
UCC 5uM QCD	19.459
circRNA		delta Ct
UCC 0uM	24.3404	5.50143
UCC 0.5uM	24.0277	5.22463
UCC 1uM	23.7463	4.96315
UCC 3uM	24.5769	5.63069
UCC 5uM	27.0168	8.02102
UCC 5uM QCD	25.3973	6.1769
UCC 0uM	25.8968	7.24689
UCC 0.5uM	24.9424	6.22732
UCC 1uM	24.3345	5.50865
UCC 3uM	23.9875	5.05867
UCC 5uM	25.9953	6.77615
UCC 5uM QCD	24.8014	5.59305
UCC 0uM	24.0643	5.26886
UCC 0.5uM	23.6344	4.82749
UCC 1uM	23.995	5.02774
UCC 3uM	24.7106	5.80891
UCC 5uM	25.0599	5.63753
UCC 5uM QCD	24.7637	5.30472

## Sheet: Fig S3 Rnase R
Rnase R treatment
	Beta actin
	Exp. No.	mock Ct	RNAse R Ct	delta Ct	RQ	Average	stdev	P value
	1	19.6497	23.0841	-3.43445	0.0924968	0.194546	0.123656
	2	21.5744	24.6025	-3.02816	0.122584
	3	24.4857	25.9258	-1.44004	0.368558
	circRNA
	Exp. No.	mock Ct	RNAse R Ct	delta Ct	RQ	Average	stdev	P value
	1	21.9743	22.6884	-0.714069	0.609598	0.603436	0.0647594	0.014346
	2	22.5268	23.0843	-0.557478	0.679489
	3	24.5852	25.5252	-0.940033	0.521221

## Sheet: Fig S4A
Batch 1
	Ct
0uM	20.1183												Calculated RQ
3uM	19.9525
5uM	19.8225													circHIPK3
5uM QCD	20.519													0uM	3uM	5uM	5uM QCD
														1.11051	0.946984	1.12304
0uM	20.1135													1.0147	0.960777	0.938979	1.17884
3uM	19.9447													0.951736	1.00651	1.10654	1.23902
5uM	19.7255																1.21734
5uM QCD	20.3332
														0.873956	0.817981	0.964703	1.00637
0uM	19.5313												Average	0.987725	0.933063	1.03332	1.16039
3uM	19.467												Std. dev	0.0866642	0.0700001	0.0821884	0.0914988
5uM	19.1995												p value		0.428002	0.533071	0.0552895
5uM QCD	19.9219
						delta Ct	delta delta Ct	RQ		beta actin Ct average	19.8874			circEPHB4
circHIPK3		dCt		0uM	circHIPK3	5.66541	-0.151225	1.11051						0uM	3uM	5uM	5uM QCD
0uM	25.7837	5.66541				5.79558	-0.0210492	1.0147			0uM ct avg			1.17093	0.553622	0.426539	1.28555
3uM	25.8477	5.89522				5.888	0.0713662	0.951736		circHIPK3	25.7041			0.660669		0.488635	0.602693
5uM	25.4717	5.64922			circEPHB4	14.7895	-0.227659	1.17093		circEPHB4	34.9046					0.547761	1.45062
5uM QCD	25.8669	5.34792				15.6151	0.598	0.660669		circFoxo3	34.9325			0.834185	0.583311	0.485886
						14.5459	-0.47125	1.38631		circPVT1	31.2416				1.22238		1.65751
0uM	25.9091	5.79558			circFoxo3	14.3879	-0.65719	1.57701						1.25548	1.40287
3uM	25.819	5.87436				14.4147	-0.630367	1.54796					Average	0.980316	0.940544	0.487205	1.24909
5uM	25.633	5.90747				16.2317	1.18665	0.439322					Std. dev	0.242681	0.377656	0.0428694	0.395784
5uM QCD	25.9125	5.57927			circPVT1	10.7209	-0.633319	1.55113					p value		0.883072	0.0133731	0.354695
						10.9884	-0.365801	1.2886
0uM	25.4193	5.888				12.2524	0.898212	0.536551						circFoxo3
3uM	25.2743	5.80727												0uM	3uM	5uM	5uM QCD
5uM	24.8701	5.67057		3uM	circHIPK3	5.89522	0.0785874	0.946984							1.806		1.70033
5uM QCD	25.4293	5.50744				5.87436	0.0577264	0.960777						1.54796		1.54065
						5.80727	-0.00936046	1.00651
circEPHB4					circEPHB4	15.8702	0.853026	0.553622						0.604824	0.633723	1.0709	0.806425
0uM	34.9078	14.7895				16.0081	0.990937	0.503151						1.00681	1.15717	1.45273	0.748514
3uM	35.8227	15.8702				14.4701	-0.547035	1.46108						1.12509	1.35916	1.29978	0.814785
5uM	36.0689	16.2464			circFoxo3	14.1923	-0.8528	1.806					Average	1.07117	1.23901	1.34101	1.01751
5uM QCD	35.1737	14.6548				14.0309	-1.01417	2.01974					Std. dev	0.336101	0.421007	0.178181	0.395052
						16.277	1.23193	0.425746					p value		0.608872	0.265211	0.863699
0uM	35.7286	15.6151			circPVT1	11.2032	-0.151023	1.11036
3uM	35.9528	16.0081				11.1018	-0.252431	1.19121						circPVT1
5uM	35.7758	16.0503				12.001	0.646816	0.638689						0uM	3uM	5uM	5uM QCD
5uM QCD	36.0808	15.7476													1.11036	1.02091
				5uM	circHIPK3	5.64922	-0.167409	1.12304						1.2886		1.10733	1.46558
0uM	34.0772	14.5459				5.90747	0.090835	0.938979							0.638689
3uM	33.9371	14.4701				5.67057	-0.14606	1.10654						0.777921			0.687115
5uM	35.0851	15.8855			circEPHB4	16.2464	1.22925	0.426539						0.717055	0.666385	0.550104	0.722809
5uM QCD	34.4024	14.4805				16.0503	1.03317	0.488635						1.22822	0.749992	0.716117	1.09339
						15.8855	0.868382	0.547761					Average	1.00295	0.791355	0.848615	0.992225
circFoxo3					circFoxo3	14.3699	-0.675195	1.59681					Std. dev	0.257251	0.188678	0.225435	0.31622
0uM	34.5062	14.3879				14.4215	-0.623536	1.54065					p value		0.294376	0.464222	0.96514
3uM	34.1448	14.1923				16.3291	1.28405	0.410642
5uM	34.1924	14.3699			circPVT1	11.3244	-0.0298506	1.02091
5uM QCD	34.7982	14.2792				11.2071	-0.147088	1.10733
						12.664	1.30979	0.403378
0uM	34.5282	14.4147
3uM	33.9756	14.0309		5uM QCD	circHIPK3	5.34792	-0.468717	1.38388
5uM	34.1471	14.4215				5.57927	-0.237367	1.17884
5uM QCD	34.5394	14.2062				5.50744	-0.309196	1.23902
					circEPHB4	14.6548	-0.362388	1.28555
0uM	35.7631	16.2317				15.7476	0.730506	0.602693
3uM	35.744	16.277				14.4805	-0.536666	1.45062
5uM	35.5287	16.3291			circFoxo3	14.2792	-0.765819	1.70033
5uM QCD	35.9461	16.0242				14.2062	-0.838861	1.78864
						16.0242	0.979157	0.507276
circPVT1					circPVT1	10.4611	-0.893069	1.85712
0uM	30.8392	10.7209				10.8027	-0.551474	1.46558
3uM	31.1557	11.2032				12.0628	0.708537	0.61194
5uM	31.1469	11.3244
5uM QCD	30.9801	10.4611
0uM	31.1019	10.9884
3uM	31.0465	11.1018
5uM	30.9327	11.2071
5uM QCD	31.1359	10.8027
0uM	31.7838	12.2524
3uM	31.4681	12.001
5uM	31.8636	12.664
5uM QCD	31.9846	12.0628
Batch 2
beta actin
	Ct
0uM	19.0728
3uM	18.9014
5uM	19.5137
5uM QCD	19.4866
0uM	18.8992
3uM	18.8073
5uM	19.1637
5uM QCD	19.2982
0uM	18.896
3uM	18.905
5uM	19.2216
5uM QCD	19.489
						delta Ct	delta delta Ct	RQ		beta actin Ct average	19.1379
circHIPK3		dCt		0uM	circHIPK3	7.0971	-0.290921	1.22342
0uM	26.1699	7.0971				8.03016	0.642138	0.640763			0uM ct avg
3uM	25.8754	6.97398				7.58239	0.194367	0.873956		circHIPK3	26.5259
5uM	26.3394	6.82572			circEPHB4	15.6587	0.261561	0.834185		circEPHB4	34.535
5uM QCD	26.5909	7.10428				16.0094	0.612259	0.654172		circFoxo3	33.3364
						15.0689	-0.328235	1.25548		circPVT1	30.6906
0uM	26.9294	8.03016			circFoxo3	14.924	0.725414	0.604824
3uM	26.607	7.79973				14.1888	-0.00979475	1.00681
5uM	26.861	7.69733				14.0285	-0.170035	1.12509
5uM QCD	26.8893	7.59112			circPVT1	11.9151	0.362304	0.777921
						12.0326	0.479844	0.717055
0uM	26.4784	7.58239				11.2562	-0.296563	1.22822
3uM	26.5828	7.67788
5uM	26.6615	7.43986		3uM	circHIPK3	6.97398	-0.414043	1.33241
5uM QCD	26.8678	7.37886				7.79973	0.411708	0.751733
						7.67788	0.289861	0.817981
circEPHB4					circEPHB4	16.1748	0.777662	0.583311
0uM	34.7315	15.6587				15.1074	-0.28969	1.22238
3uM	35.0762	16.1748				14.9087	-0.488378	1.40287
5uM	35.9521	16.4384			circFoxo3	14.8566	0.658077	0.633723
5uM QCD	35.6873	16.2006				13.988	-0.210598	1.15717
						13.7558	-0.442711	1.35916
0uM	34.9086	16.0094			circPVT1	12.4085	0.855721	0.552589
3uM	33.9147	15.1074				12.1383	0.585572	0.666385
5uM	35.1544	15.9908				11.9678	0.415053	0.749992
5uM QCD	33.9663	14.6681
				5uM	circHIPK3	6.82572	-0.562305	1.47663
0uM	33.9649	15.0689				7.69733	0.309314	0.807026
3uM	33.8137	14.9087				7.43986	0.0518425	0.964703
5uM	35.8865	16.6648			circEPHB4	16.4384	1.04131	0.485886
5uM QCD	33.252	13.763				15.9908	0.593662	0.662659
						16.6648	1.26775	0.415308
circFoxo3					circFoxo3	14.0997	-0.098824	1.0709
0uM	33.9968	14.924				13.6598	-0.538764	1.45273
3uM	33.758	14.8566				13.8203	-0.378272	1.29978
5uM	33.6134	14.0997			circPVT1	14.084	2.53127	0.172986
5uM QCD	33.9956	14.5089				12.415	0.862223	0.550104
						12.0345	0.481732	0.716117
0uM	33.088	14.1888
3uM	32.7953	13.988		5uM QCD	circHIPK3	7.10428	-0.283736	1.21734
5uM	32.8235	13.6598				7.59112	0.203101	0.868681
5uM QCD	33.9146	14.6164				7.37886	-0.00916208	1.00637
					circEPHB4	16.2006	0.803543	0.57294
0uM	32.9245	14.0285				14.6681	-0.729017	1.65751
3uM	32.6608	13.7558				13.763	-1.63408	3.10389
5uM	33.0419	13.8203			circFoxo3	14.5089	0.310388	0.806425
5uM QCD	33.983	14.4941				14.6164	0.4179	0.748514
						14.4941	0.295509	0.814785
circPVT1					circPVT1	12.0941	0.541377	0.687115
0uM	30.9879	11.9151				12.0211	0.468314	0.722809
3uM	31.3099	12.4085				11.4239	-0.128812	1.09339
5uM	33.5977	14.084
5uM QCD	31.5808	12.0941
0uM	30.9318	12.0326
3uM	30.9456	12.1383
5uM	31.5786	12.415
5uM QCD	31.3192	12.0211
0uM	30.1522	11.2562
3uM	30.8728	11.9678
5uM	31.2561	12.0345
5uM QCD	30.9129	11.4239

## Sheet: Fig S4B
Batch 1
	Ct
0uM	19.2056												Calculated RQ
3uM	18.9037
5uM	19.2386													circHIPK3
5uM QCD	19.4878													0uM	3uM	5uM	5uM QCD
														0.784059	0.69663	1.01754	0.987595
0uM	19.0208														1.03286
3uM	18.986															0.902208
5uM	19.3072													1.36108		1.18721	1.4051
5uM QCD	19.4683													0.89517	0.76593		0.998827
														0.7704	0.909708	0.911009	0.994195
0uM	18.9022												Average	0.952678	0.851283	1.00449	1.09643
3uM	18.8647												Std. dev	0.240707	0.129988	0.114843	0.178257
5uM	19.2472												p value	0.277945	0.544619	0.747963	0.437644
5uM QCD	19.2869
						delta Ct	delta delta Ct	RQ		beta actin Ct average	19.1599			circEPHB4
circHIPK3		dCt		0uM	circHIPK3	7.6864	0.350966	0.784059						0uM	3uM	5uM	5uM QCD
0uM	26.892	7.6864				6.85398	-0.481452	1.39615			0uM ct avg			1.04394	0.527985
3uM	26.7607	7.85697				7.81703	0.481595	0.716185		circHIPK3	26.4954						0.985781
5uM	26.549	7.31036			circEPHB4	15.1965	-0.0620453	1.04394		circEPHB4	34.4184					0.395278	1.50512
5uM QCD	26.8412	7.35345				14.9369	-0.321654	1.24976		circFoxo3	33.0915			1.06005	0.717042	0.675668	0.567225
						15.9933	0.734808	0.600898		circPVT1	30.5498			0.955311	0.551963	0.362293	0.745502
0uM	25.8748	6.85398			circFoxo3	14.3741	0.442579	0.735818						0.926901	0.599236	0.518822
3uM	26.2747	7.28879				13.8691	-0.0624356	1.04423					Average	0.996553	0.599057	0.488015	0.950907
5uM	26.1088	6.80157				13.9025	-0.0290341	1.02033					Std. dev	0.0566365	0.0727831	0.123054	0.352764
5uM QCD	26.1657	6.69736			circPVT1	11.376	-0.0139038	1.00968					p value		0.000298031	0.000630033	0.832208
						11.3935	0.00368198	0.997451
0uM	26.7193	7.81703				11.7512	0.361331	0.778446						circFoxo3
3uM	26.7817	7.917												0uM	3uM	5uM	5uM QCD
5uM	26.7311	7.48391		3uM	circHIPK3	7.85697	0.521535	0.69663						0.735818			1.38023
5uM QCD	26.8797	7.59274				7.28879	-0.0466491	1.03286						1.04423		1.22033
						7.917	0.581563	0.668239						1.02033	0.93179	1.84436	1.22877
circEPHB4					circEPHB4	16.18	0.921432	0.527985						1.0119	1.02701		1.08846
0uM	34.4021	15.1965				15.716	0.457455	0.72827							0.976439	0.980754
3uM	35.0837	16.18				16.8916	1.63303	0.32241							0.877396	1.1912	1.16123
5uM	34.9194	15.6807			circFoxo3	13.7185	-0.213076	1.15916					Average	0.953068	0.953159	1.30916	1.21467
5uM QCD	33.6258	14.138				14.4134	0.481805	0.716081					Std. dev	0.125988	0.0552107	0.322526	0.107694
						14.0335	0.101923	0.93179					p value		0.999118	0.125163	0.0340138
0uM	33.9577	14.9369			circPVT1	11.8296	0.439784	0.737245
3uM	34.7019	15.716				11.4734	0.0835827	0.943711						circPVT1
5uM	40	20.6928				12.1049	0.714995	0.609207						0uM	3uM	5uM	5uM QCD
5uM QCD	34.7475	15.2792												1.00968	0.737245	0.644267
				5uM	circHIPK3	7.31036	-0.0250789	1.01754						0.997451	0.943711	0.601593	0.947348
0uM	34.8956	15.9933				6.80157	-0.533866	1.4478									0.97337
3uM	35.7562	16.8916				7.48391	0.148469	0.902208							1.10529
5uM	35.8448	16.5976			circEPHB4	15.6807	0.422213	0.746279						0.956955		0.688117	0.967471
5uM QCD	33.9556	14.6686				20.6928	5.43424	0.0231275						0.826661	0.866563	0.743717	1.101
						16.5976	1.33906	0.395278					Average	0.947688	0.913201	0.669424	0.997298
circFoxo3					circFoxo3	13.0233	-0.90828	1.87681					Std. dev	0.0725485	0.133194	0.0526848	0.0606457
0uM	33.5797	14.3741				13.6443	-0.287266	1.22033					p value		0.707321	0.00170293	0.398527
3uM	32.6222	13.7185				13.0484	-0.883118	1.84436
5uM	32.2619	13.0233			circPVT1	12.0241	0.634269	0.644267
5uM QCD	32.9544	13.4666				12.123	0.73314	0.601593
						12.2633	0.873402	0.545858
0uM	32.89	13.8691
3uM	33.3993	14.4134		5uM QCD	circHIPK3	7.35345	0.0180081	0.987595
5uM	32.9515	13.6443				6.69736	-0.638082	1.55626
5uM QCD	33.7159	14.2475				7.59274	0.257302	0.836651
					circEPHB4	14.138	-1.12052	2.17425
0uM	32.8048	13.9025				15.2792	0.0206603	0.985781
3uM	32.8982	14.0335				14.6686	-0.589876	1.50512
5uM	32.2956	13.0484			circFoxo3	13.4666	-0.464905	1.38023
5uM QCD	32.9213	13.6343				14.2475	0.315965	0.803313
						13.6343	-0.297219	1.22877
circPVT1					circPVT1	11.4594	0.0695408	0.952941
0uM	30.5815	11.376				11.4679	0.0780342	0.947348
3uM	30.7334	11.8296				11.4288	0.0389393	0.97337
5uM	31.2627	12.0241
5uM QCD	30.9472	11.4594
0uM	30.4144	11.3935
3uM	30.4594	11.4734
5uM	31.4302	12.123
5uM QCD	30.9362	11.4679
0uM	30.6534	11.7512
3uM	30.9695	12.1049
5uM	31.5104	12.2633
5uM QCD	30.7157	11.4288
Batch 2
beta actin
	Ct
0uM	19.2773
3uM	19.3038
5uM	18.9758
5uM QCD	19.6834
0uM	18.896
3uM	18.7334
5uM	18.4846
5uM QCD	19.1808
0uM	18.7656
3uM	18.8944
5uM	18.6808
5uM QCD	19.2453
						delta Ct	delta delta Ct	RQ		beta actin Ct average	19.0101
circHIPK3		dCt		0uM	circHIPK3	6.23638	-0.444755	1.36108
0uM	25.5137	6.23638				6.8409	0.159766	0.89517			0uM ct avg
3uM	25.4837	6.17997				7.05745	0.376321	0.7704		circHIPK3	25.6912
5uM	25.4094	6.43356			circEPHB4	13.6397	-0.0841389	1.06005		circEPHB4	32.7339
5uM QCD	25.8738	6.19046				13.7898	0.0659581	0.955311		circFoxo3	32.3916
						13.8333	0.109512	0.926901		circPVT1	30.7155
0uM	25.7369	6.8409			circFoxo3	13.3644	-0.0170625	1.0119
3uM	25.7992	7.06585				13.0332	-0.348285	1.27305
5uM	25.4295	6.94484				13.8382	0.456679	0.728662
5uM QCD	25.8636	6.68283			circPVT1	11.4586	-0.246777	1.18655
						11.7689	0.0634777	0.956955
0uM	25.8231	7.05745				11.98	0.274631	0.826661
3uM	25.712	6.81766
5uM	25.4964	6.8156		3uM	circHIPK3	6.17997	-0.501162	1.41535
5uM QCD	25.9348	6.68953				7.06585	0.384715	0.76593
						6.81766	0.136525	0.909708
circEPHB4					circEPHB4	14.2037	0.47987	0.717042
0uM	32.917	13.6397				14.5811	0.857355	0.551963
3uM	33.5074	14.2037				14.4626	0.738804	0.599236
5uM	33.2652	14.2894			circFoxo3	13.3431	-0.0384528	1.02701
5uM QCD	34.2252	14.5418				13.4159	0.0343979	0.976439
						13.5702	0.1887	0.877396
0uM	32.6858	13.7898			circPVT1	11.561	-0.144419	1.10529
3uM	33.3145	14.5811				11.5498	-0.15564	1.11392
5uM	33.6732	15.1886				11.912	0.206624	0.866563
5uM QCD	33.3283	14.1475
				5uM	circHIPK3	6.43356	-0.24757	1.18721
0uM	32.5989	13.8333				6.94484	0.263707	0.832945
3uM	33.357	14.4626				6.8156	0.134463	0.911009
5uM	33.3512	14.6705			circEPHB4	14.2894	0.565614	0.675668
5uM QCD	33.9115	14.6662				15.1886	1.46477	0.362293
						14.6705	0.946688	0.518822
circFoxo3					circFoxo3	13.6248	0.243278	0.844823
0uM	32.6417	13.3644				13.4095	0.0280369	0.980754
3uM	32.6468	13.3431				13.1291	-0.25242	1.1912
5uM	32.6006	13.6248			circPVT1	11.94	0.234541	0.849955
5uM QCD	32.9426	13.2592				12.2447	0.539273	0.688117
						12.1326	0.427175	0.743717
0uM	31.9293	13.0332
3uM	32.1493	13.4159		5uM QCD	circHIPK3	6.19046	-0.490677	1.4051
5uM	31.8942	13.4095				6.68283	0.00169257	0.998827
5uM QCD	31.9914	12.8106				6.68953	0.0083988	0.994195
					circEPHB4	14.5418	0.818006	0.567225
0uM	32.6038	13.8382				14.1475	0.423716	0.745502
3uM	32.4646	13.5702				14.6662	0.942434	0.520354
5uM	31.8099	13.1291			circFoxo3	13.2592	-0.122292	1.08846
5uM QCD	32.4112	13.1659				12.8106	-0.570876	1.48543
						13.1659	-0.215652	1.16123
circPVT1					circPVT1	10.9833	-0.72215	1.64964
0uM	30.7359	11.4586				11.7531	0.0477097	0.967471
3uM	30.8648	11.561				11.5666	-0.138816	1.101
5uM	30.9158	11.94
5uM QCD	30.6666	10.9833
0uM	30.6649	11.7689
3uM	30.2831	11.5498
5uM	30.7293	12.2447
5uM QCD	30.9339	11.7531
0uM	30.7457	11.98
3uM	30.8064	11.912
5uM	30.8134	12.1326
5uM QCD	30.8119	11.5666

## Sheet: Fig S5
	UCC 0												UCC
	dCt	ddCt	RQ	Average	Stdev	P value	median						Batch 1	0uM ct avg
Batch 1	4.33556	-0.178585	1.13177	0.986312	0.263437		1.12982							23.8079
	5.51215	0.998009	0.500691											beta act average
	4.16938	-0.344757	1.26994											19.2938
Batch 2	2.62732	0.451526	0.731269										Batch 2	0uM ct avg
	2.30479	0.128996	0.914468											21.1868
	1.9997	-0.176097	1.12982											beta act average
Batch 3	5.50143	-0.294223	1.22622											19.011
	7.24689	1.45123											Batch 3	0uM ct avg
	5.26886	-0.5268												24.7672
														beta act average
	GGA 0													18.9715
Batch 1	7.97494	3.4608	0.0908228	0.0744509	0.0439021	2.37928e-06	0.0908228
	7.514	2.99986	0.125012
	7.2786	2.76445
Batch 2	8.8405	6.6647	0.00985655
	7.71379	5.53799	0.0215227
	9.70446	7.52866
Batch 3	10.1753	4.37963	0.0480396
	8.8922	3.09654	0.116909
	8.99333	3.19768	0.108994
	GGA 5
Batch 1	4.76953	0.255385		0.409658	0.253097	0.00224196	0.512336
	5.31143	0.797288	0.57543
	5.47898	0.964838	0.512336
Batch 2	6.27785	4.10205	0.0582317
	5.71072	3.53492	0.0862744
	6.48884	4.31305
Batch 3	6.7008	0.90514	0.533981
	6.11264	0.316989	0.802744
	7.53933	1.74367	0.298609
